# Supplementary material
Source: PubMed Central journal article supplement (PMC5405265)
Supplement: JCM.02334-16_zjm999095464s1.pdf [file JCM.02334-16_zjm999095464s1.pdf]

**TABLE S1** HEV sequence variants selected for evaluation by HEV RT-qPCR

| GenBank accession no. <sup>a</sup> | HEV GT | Forward primer<br>GGTGGTTTCTGGGGTGAC | Probe<br>G*TGATTCTCAGCCCTTCG  | Reverse primer<br>TTCATCCAACCAACCCCT  | Nucleotide position |
|------------------------------------|--------|--------------------------------------|-------------------------------|---------------------------------------|---------------------|
| AF060669                           | 3a     | <b>GGTGGTTTCTGGGGTGAC</b>            | <b>agggtTGATTCTCAGCCCTTCG</b> | <b>ccctcccctataTTCATCCAACCAACCCCT</b> | 5311 - 5380         |
| M74506                             | 2a     | .....c.....                          | .....aa.....                  | .....                                 | 5231 - 5300         |
| GU119960                           | U      | A.....c.....                         | .....                         | .....                                 | 5299 - 5368         |
| AF060668                           | 3a     | .....A.....                          | .....                         | .....                                 | 5246 - 5315         |
| FJ457024                           | U      | .....c.....                          | .....aa.....                  | .....T.....                           | 5261 - 5330         |
| AB369688                           | 4      | .....c.....                          | .....a.....                   | .....T.....                           | 5279 - 5348         |
| AB425831                           | 3      | .....                                | .....C.....                   | .....                                 | 5286 - 5355         |
| AB089824                           | 3a     | .....                                | .....C.....                   | .....                                 | 5304 - 5373         |
| DQ022752                           | U      | .....c.....                          | .....T.....                   | .....                                 | 129 - 198           |
| AF058684                           | 1a     | .....c.....                          | .....C.....aa.....            | .....                                 | 247 - 316           |
| AB075971                           | U      | .....c.....                          | .....A.....                   | .....                                 | 234 - 303           |
| AB222183                           | 3      | .....c.....                          | .....T.....                   | .....                                 | 5286 - 5355         |
| FJ998008                           | U      | A.....                               | .....C.....                   | .....                                 | 5261 - 5330         |
| DQ279091                           | 4      | A.....c.....                         | .....A.....                   | .....                                 | 5297 - 5366         |
| AY575857                           | U      | .....                                | .....C.....                   | .....G.....                           | 5302 - 5371         |
| DQ079627                           | U      | .....                                | C.....C.....                  | C.....                                | 115 - 184           |

<sup>a</sup> HEV sequences selected from a comprehensive multiple sequence alignment ( $n = 203$ ) based on high-level nucleotide mismatching within primer and/or probe binding regions.

GT, genotype; U, unknown.

**TABLE S2** HEV sequence variant detection by HEV RT-qPCR

| GenBank accession no. <sup>a</sup> | HEV GT | Oligonucleotide concentration (copies/reaction) | No. of forward primer mismatches | No. of probe mismatches | No. of reverse primer mismatches | Amplification curve (cycles) | Dissociation peak $T_m$ (°C) |
|------------------------------------|--------|-------------------------------------------------|----------------------------------|-------------------------|----------------------------------|------------------------------|------------------------------|
| AF060669                           | 3a     | 1,000                                           | 0                                | 0                       | 0                                | 33.8                         | 68.2                         |
| M74506                             | 2a     | 1,000                                           | 0                                | 0                       | 0                                | 33.5                         | 68.2                         |
| GU119960                           | U      | 1,000                                           | 1                                | 0                       | 0                                | 32.8                         | 68.2                         |
| AF060668                           | 3a     | 1,000                                           | 1                                | 0                       | 0                                | 34.0                         | 68.2                         |
| FJ457024                           | U      | 1,000                                           | 0                                | 0                       | 1                                | 33.7                         | 68.2                         |
| AB369688                           | 4      | 1,000                                           | 0                                | 0                       | 1                                | 33.6                         | 68.2                         |
| AB425831                           | 3      | 1,000                                           | 0                                | 1                       | 0                                | 36.1                         | 59.2                         |
| AB089824                           | 3a     | 1,000                                           | 0                                | 1                       | 0                                | 35.5                         | 61.2                         |
| DQ022752                           | U      | 1,000                                           | 0                                | 1                       | 0                                | 38.8                         | 57.7                         |
| AF058684                           | 1a     | 1,000                                           | 0                                | 1                       | 0                                | 34.4                         | 64.0                         |
| AB075971                           | U      | 1,000                                           | 0                                | 1                       | 0                                | 36.1                         | 61.2                         |
| AB222183                           | 3      | 1,000                                           | 0                                | 1                       | 0                                | 37.8                         | 61.8                         |
| FJ998008                           | U      | 1,000                                           | 1                                | 1                       | 0                                | 35.7                         | 62.6                         |
| DQ279091                           | 4      | 1,000                                           | 1                                | 1                       | 0                                | 36.2                         | 61.8                         |
| AY575857                           | U      | 1,000                                           | 0                                | 1                       | 1                                | 35.0                         | 63.3                         |
| DQ079627                           | U      | 1,000                                           | 0                                | 2                       | 1                                | 38.4                         | 59.1                         |

<sup>a</sup> DNA oligonucleotides were synthesized based on corresponding nucleotide sequences, PAGE purified, spectrophotometrically quantified and diluted in 10 mM TRIS, pH 9.0 prior to testing.

GT, genotype; U, unknown;  $T_m$ , melting temperature.

**TABLE S3** Limit of detection for HEV RT-qPCR

| HEV RNA (IU/ml) <sup>a</sup> | HEV RNA (log <sub>10</sub> IU/ml) | No. of replicates tested | No. of replicates detected | % Detected (95% CI) |
|------------------------------|-----------------------------------|--------------------------|----------------------------|---------------------|
| 500                          | 2.70                              | 12                       | 12                         | 100.0 (73.5, 100.0) |
| 200                          | 2.30                              | 12                       | 12                         | 100.0 (73.5, 100.0) |
| 50                           | 1.70                              | 12                       | 12                         | 100.0 (73.5, 100.0) |
| 20                           | 1.30                              | 12                       | 9                          | 75.0 (42.8, 94.5)   |
| 10                           | 1.00                              | 12                       | 8                          | 66.7 (34.9, 90.1)   |
| 0                            | -                                 | 12                       | 0                          | 0.0 (0.0, 26.5)     |

Probit value (95% detection rate) = 25.2 IU/ml (95% CI; 19.2, 44.1)

<sup>a</sup> WHO International Standard for HEV RNA, code 6329/10, diluted in normal human serum. CI, confidence interval.

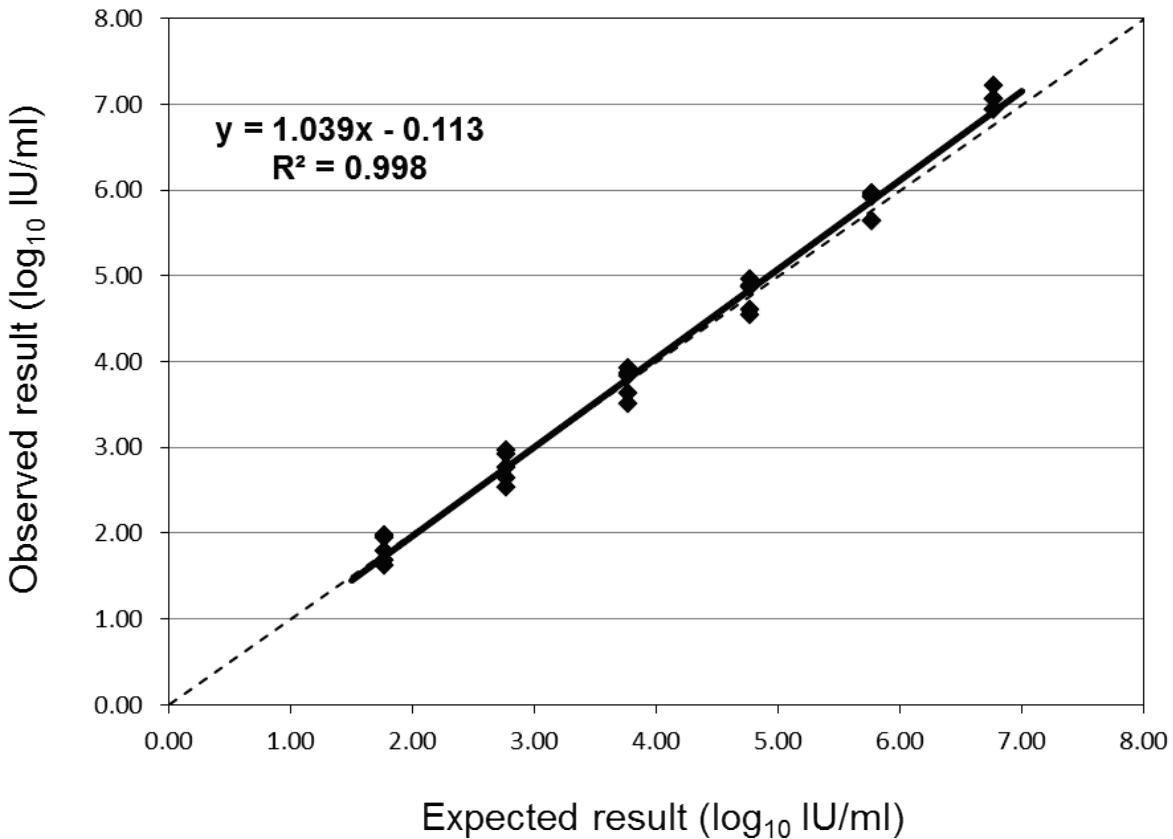

**FIG S1** HEV RT-qPCR linearity with serial 10-fold dilutions of SynTura HEV (Thermo Scientific Quality Controls) prepared in normal human serum and tested five times each.

**TABLE S4** SynTura HEV calibrator and control performance

| HEV<br>RT-qPCR<br>run no. | Standard curve |        | Assay control results |                   |              |                   |              |
|---------------------------|----------------|--------|-----------------------|-------------------|--------------|-------------------|--------------|
|                           | Slope          | $R^2$  | High positive         |                   | Low positive |                   | Negative     |
|                           |                |        | IU/ml                 | $\log_{10}$ IU/ml | IU/ml        | $\log_{10}$ IU/ml |              |
| 1                         | -3.37          | 0.9999 | 62,800                | 4.80              | 584          | 2.77              | Not detected |
| 2                         | -3.38          | 0.9997 | 70,100                | 4.85              | 649          | 2.81              | Not detected |
| 3                         | -3.33          | 0.9999 | 71,900                | 4.86              | 575          | 2.76              | Not detected |
| 4                         | -3.31          | 0.9990 | 66,800                | 4.82              | 711          | 2.85              | Not detected |
| 5                         | -3.31          | 0.9998 | 62,000                | 4.79              | 628          | 2.80              | Not detected |
| 6                         | -3.30          | 0.9994 | 64,400                | 4.81              | 487          | 2.69              | Not detected |
| 7                         | -3.32          | 0.9992 | 59,000                | 4.77              | 636          | 2.80              | Not detected |
| 8                         | -3.30          | 0.9998 | 64,700                | 4.81              | 736          | 2.87              | Not detected |
| 9                         | -3.34          | 1.0000 | 67,900                | 4.83              | 674          | 2.83              | Not detected |
| 10                        | -3.34          | 0.9992 | 81,200                | 4.91              | 621          | 2.79              | Not detected |
| Mean                      | -3.33          | 0.9996 | 67,100                | 4.83              | 630          | 2.80              | -            |
| SD                        | 0.03           | 0.0004 | 6,280                 | 0.04              | 71           | 0.05              | -            |
